# Supplementary material for: The effect of sexually transmitted co-infections on HIV viral load amongst individuals on antiretroviral therapy: a systematic review and meta-analysis
Source: Springer Nature journal article supplement (doi:10.1186/s12879-015-0961-5), 2015-06-29

Studies Sizes: Number of data points

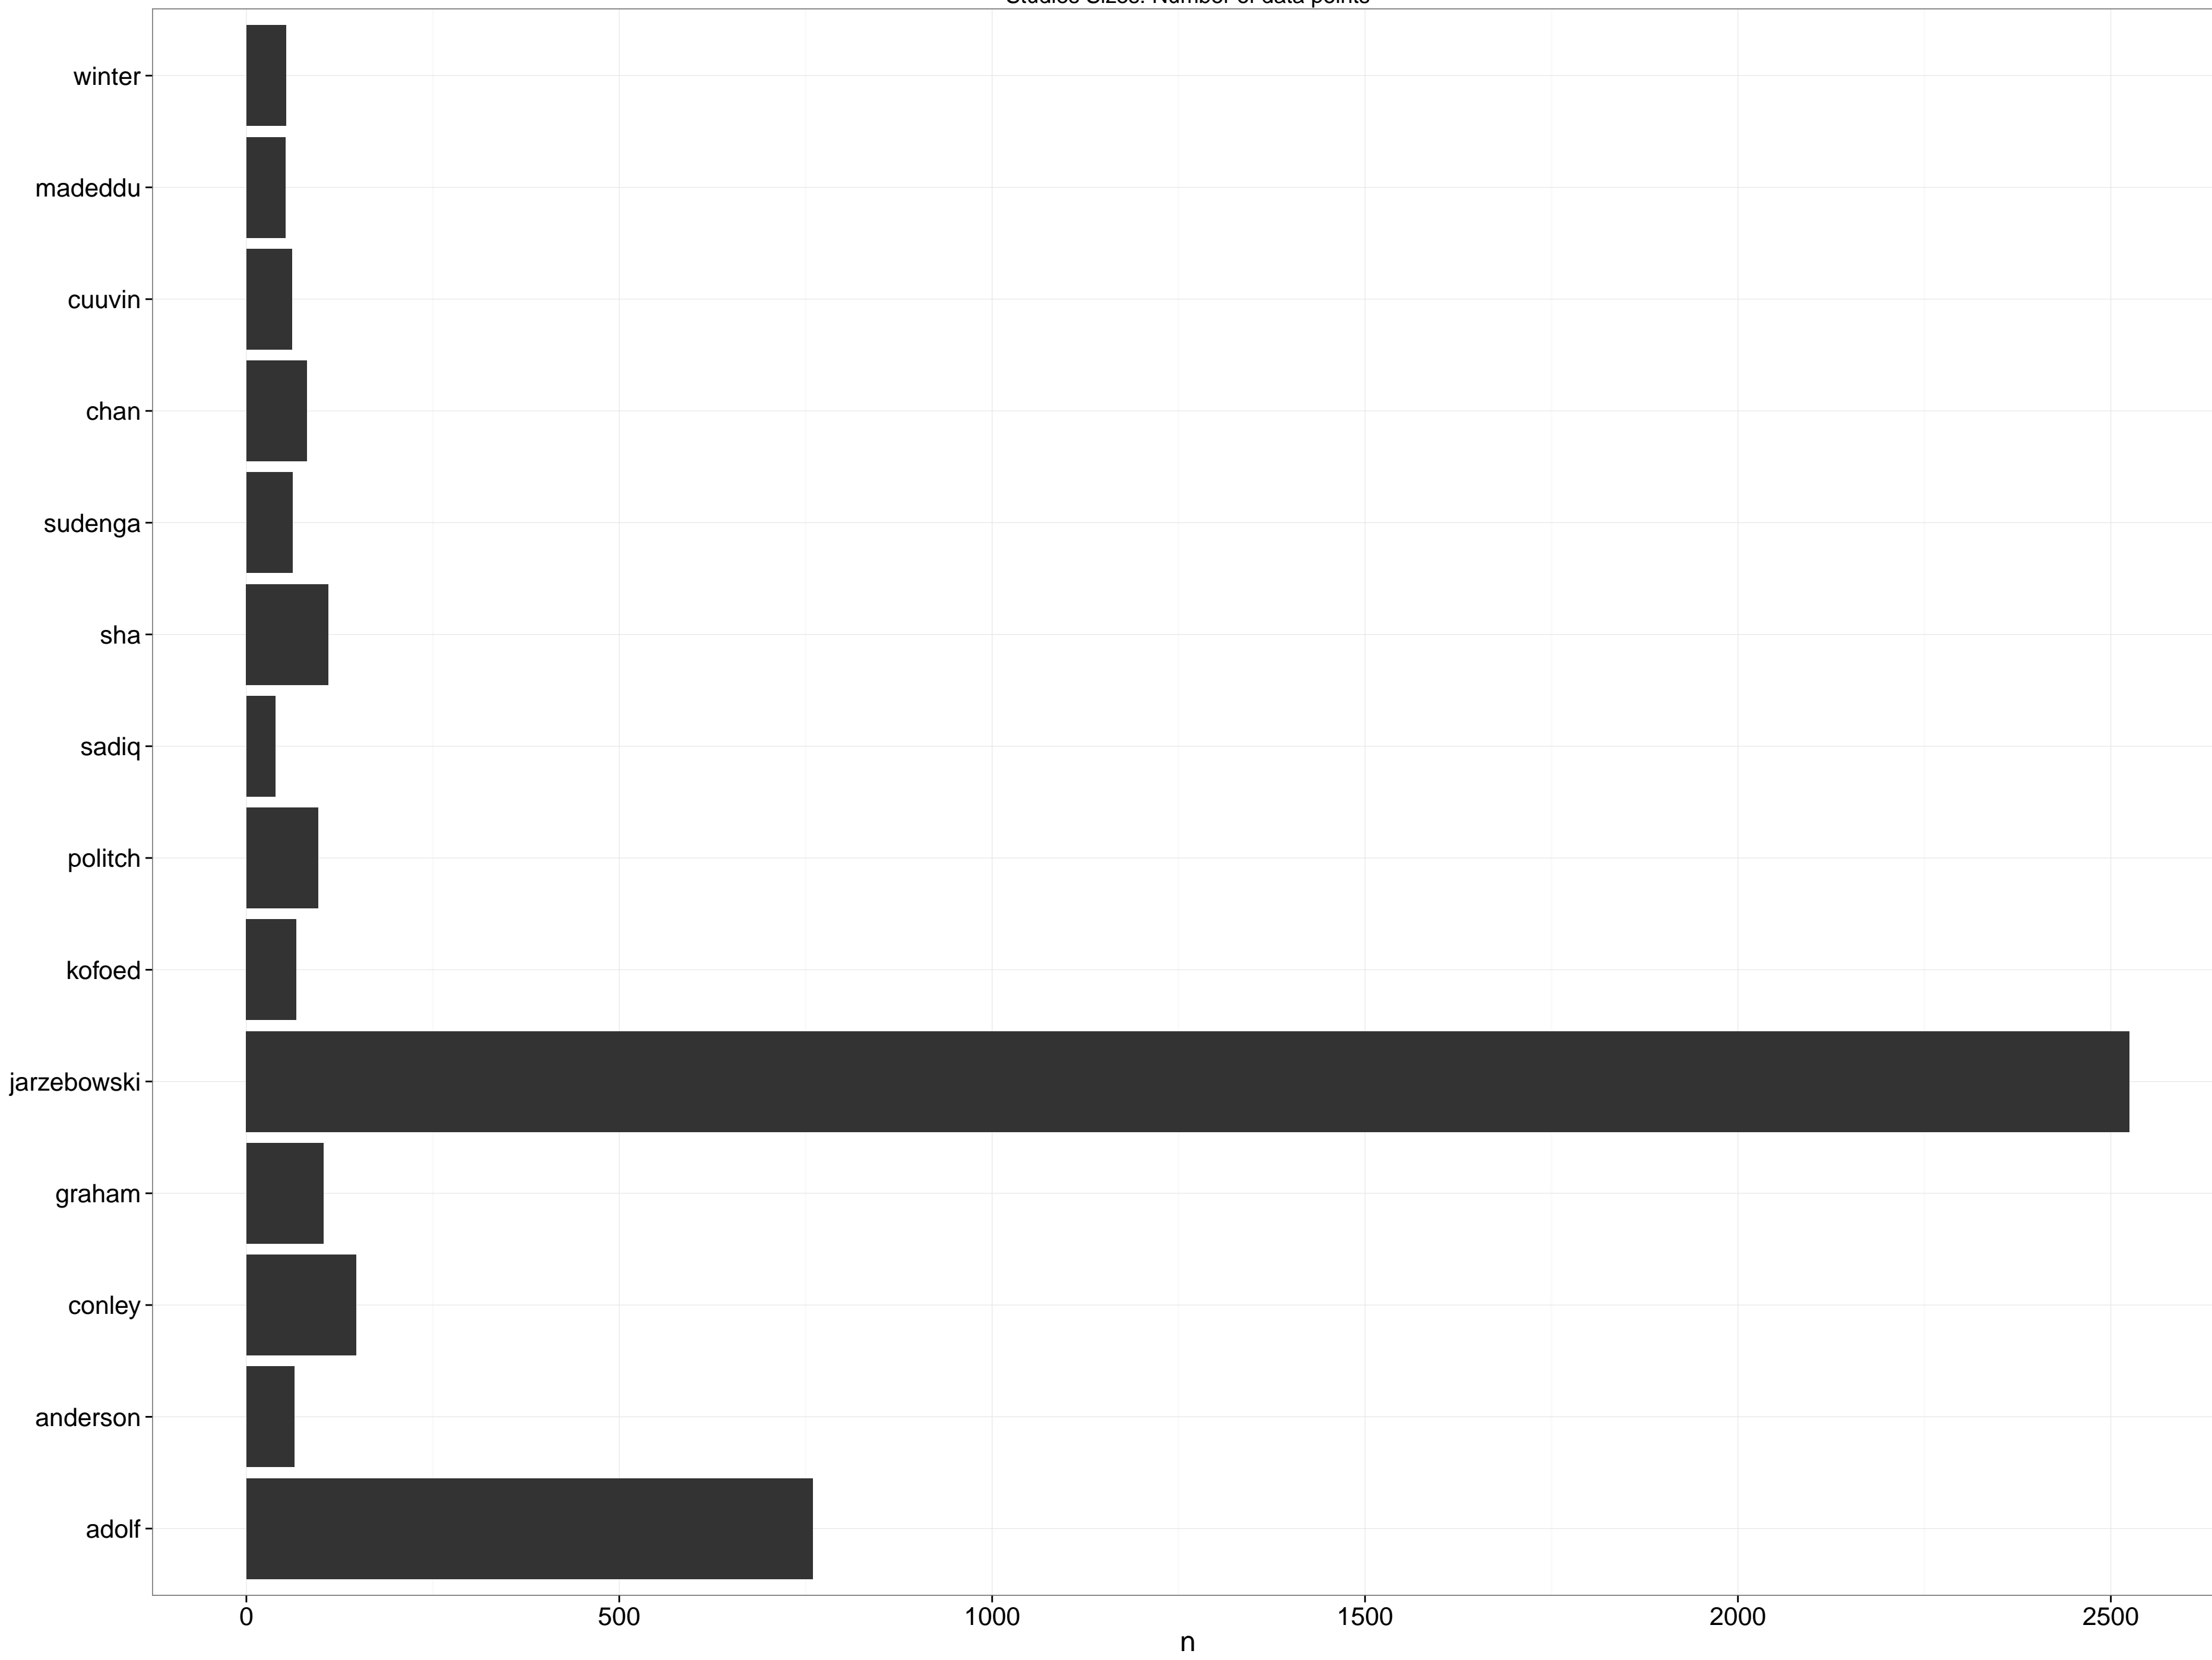

Continuous studies and log10 viral load by STI co-infection status

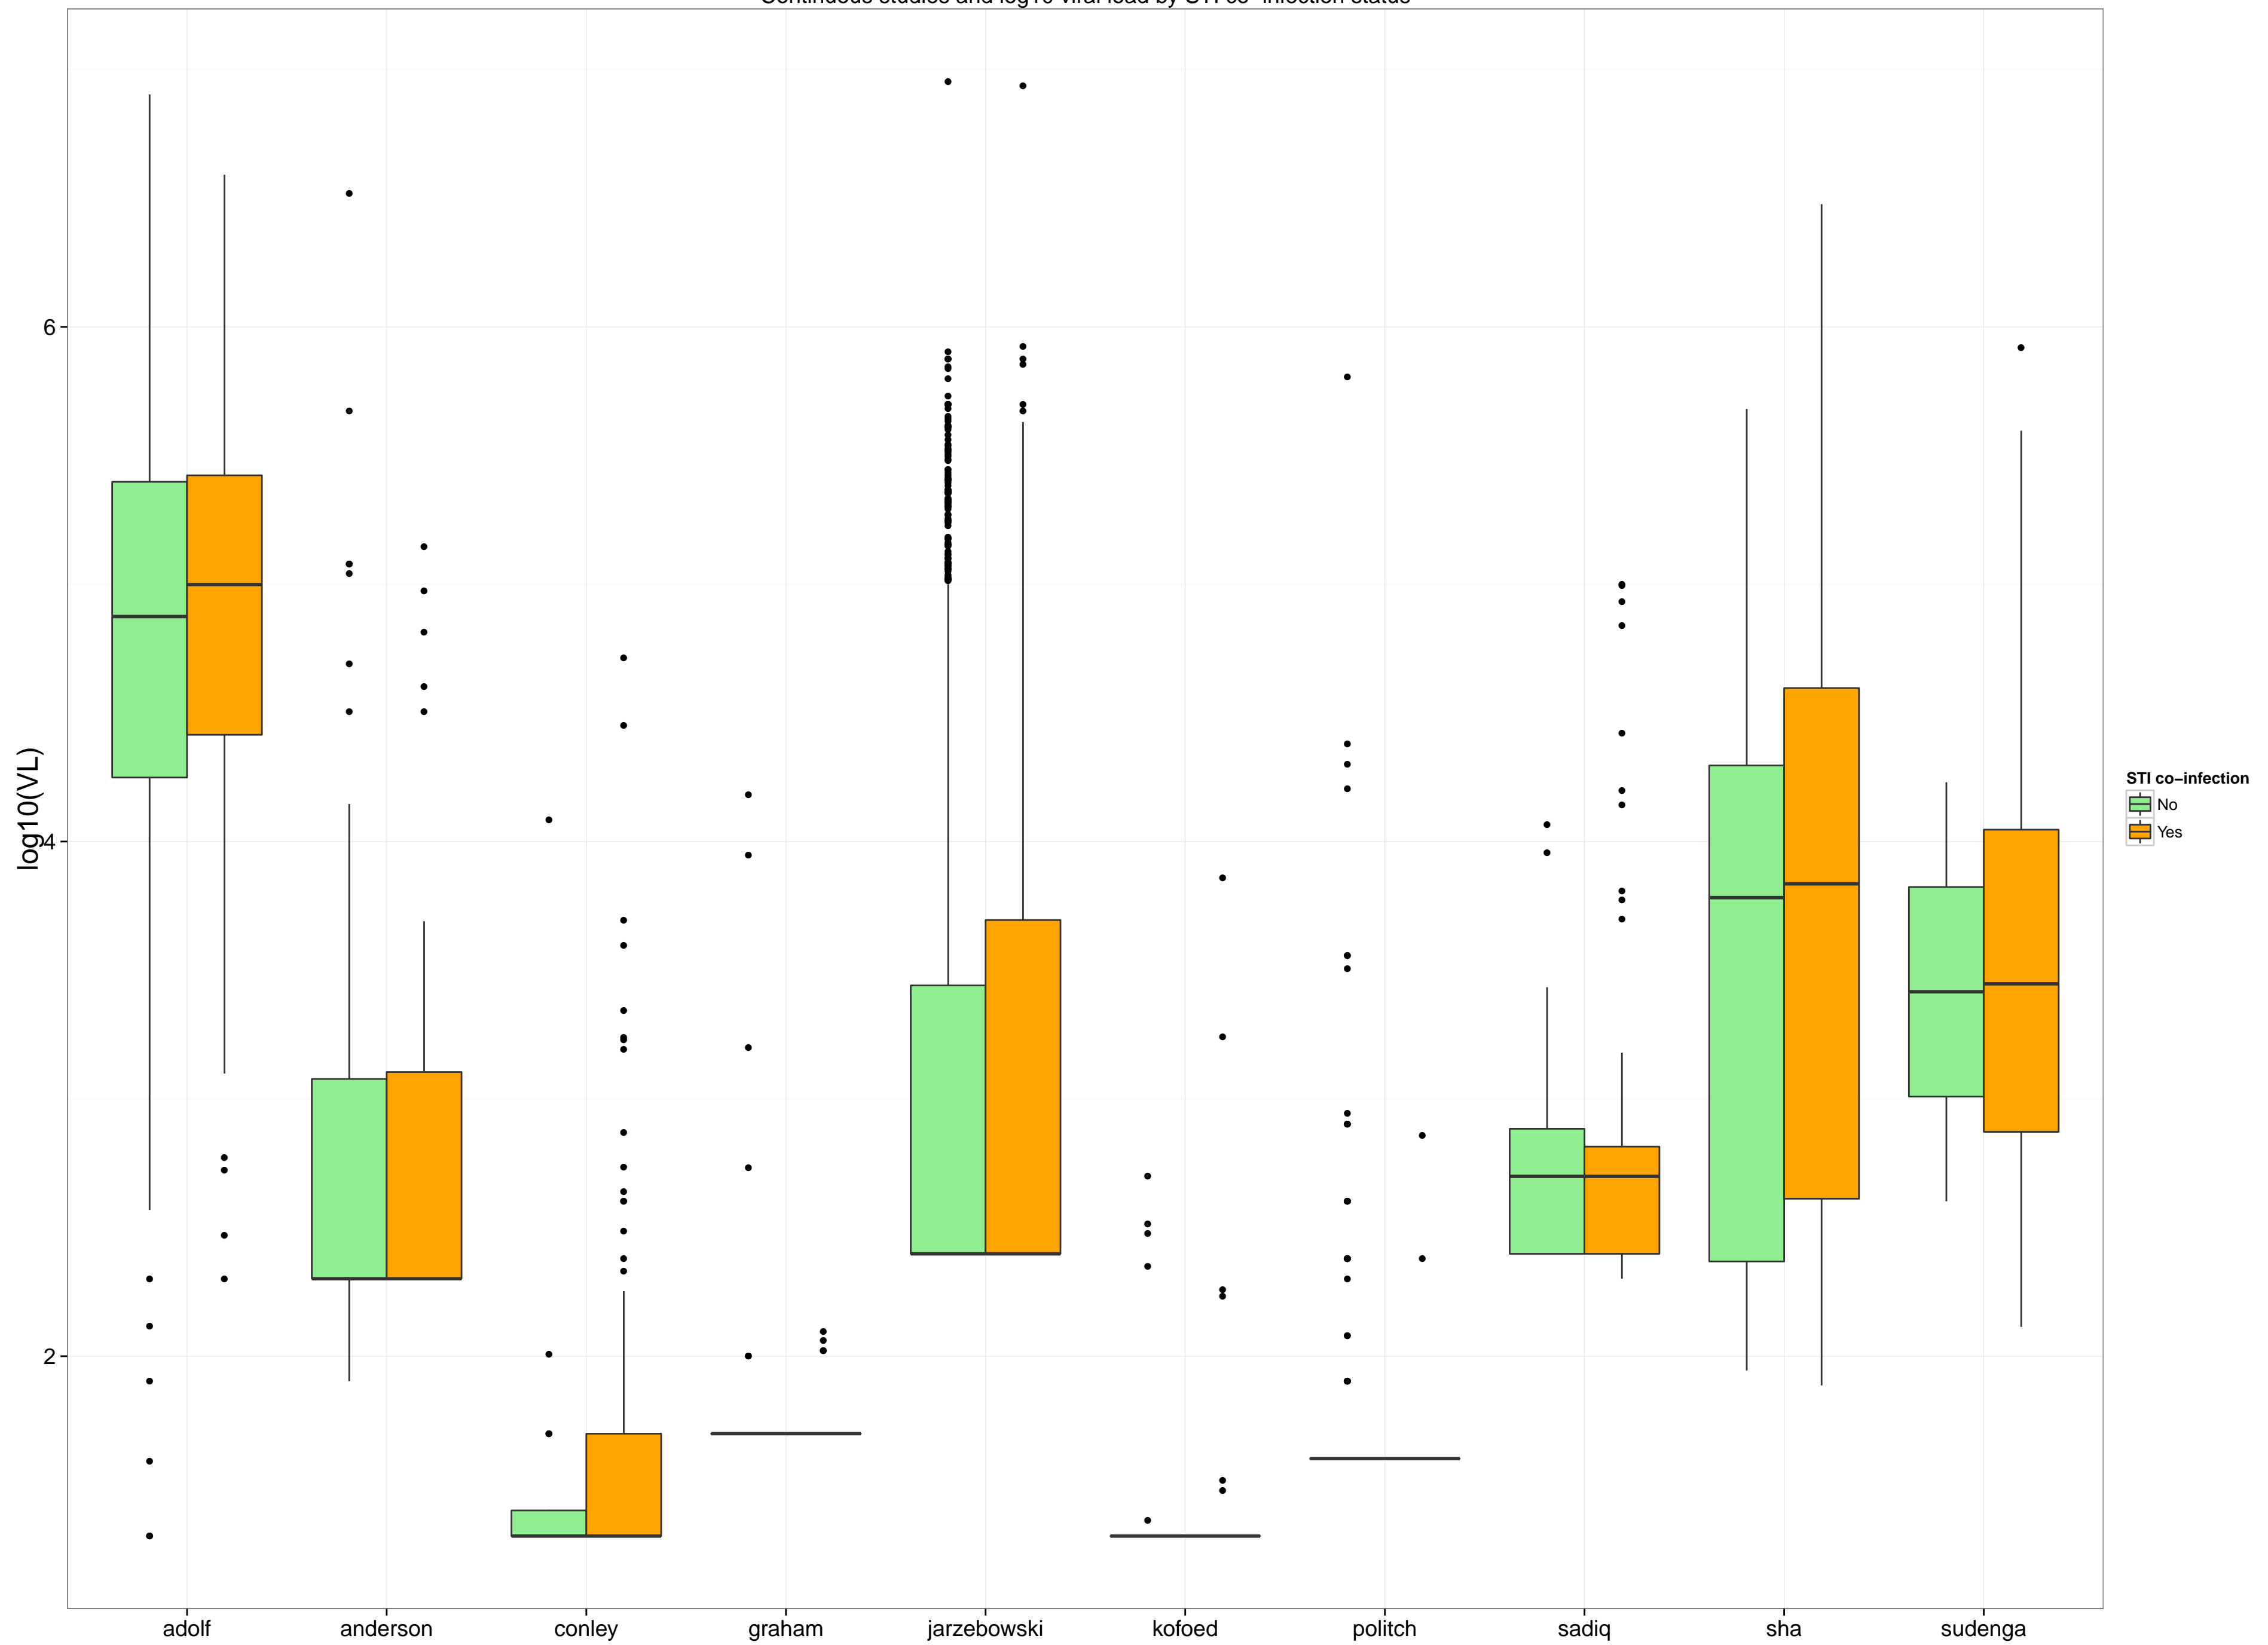

Dichotomous Studies: number of visits by co-infection status and HIV viral load

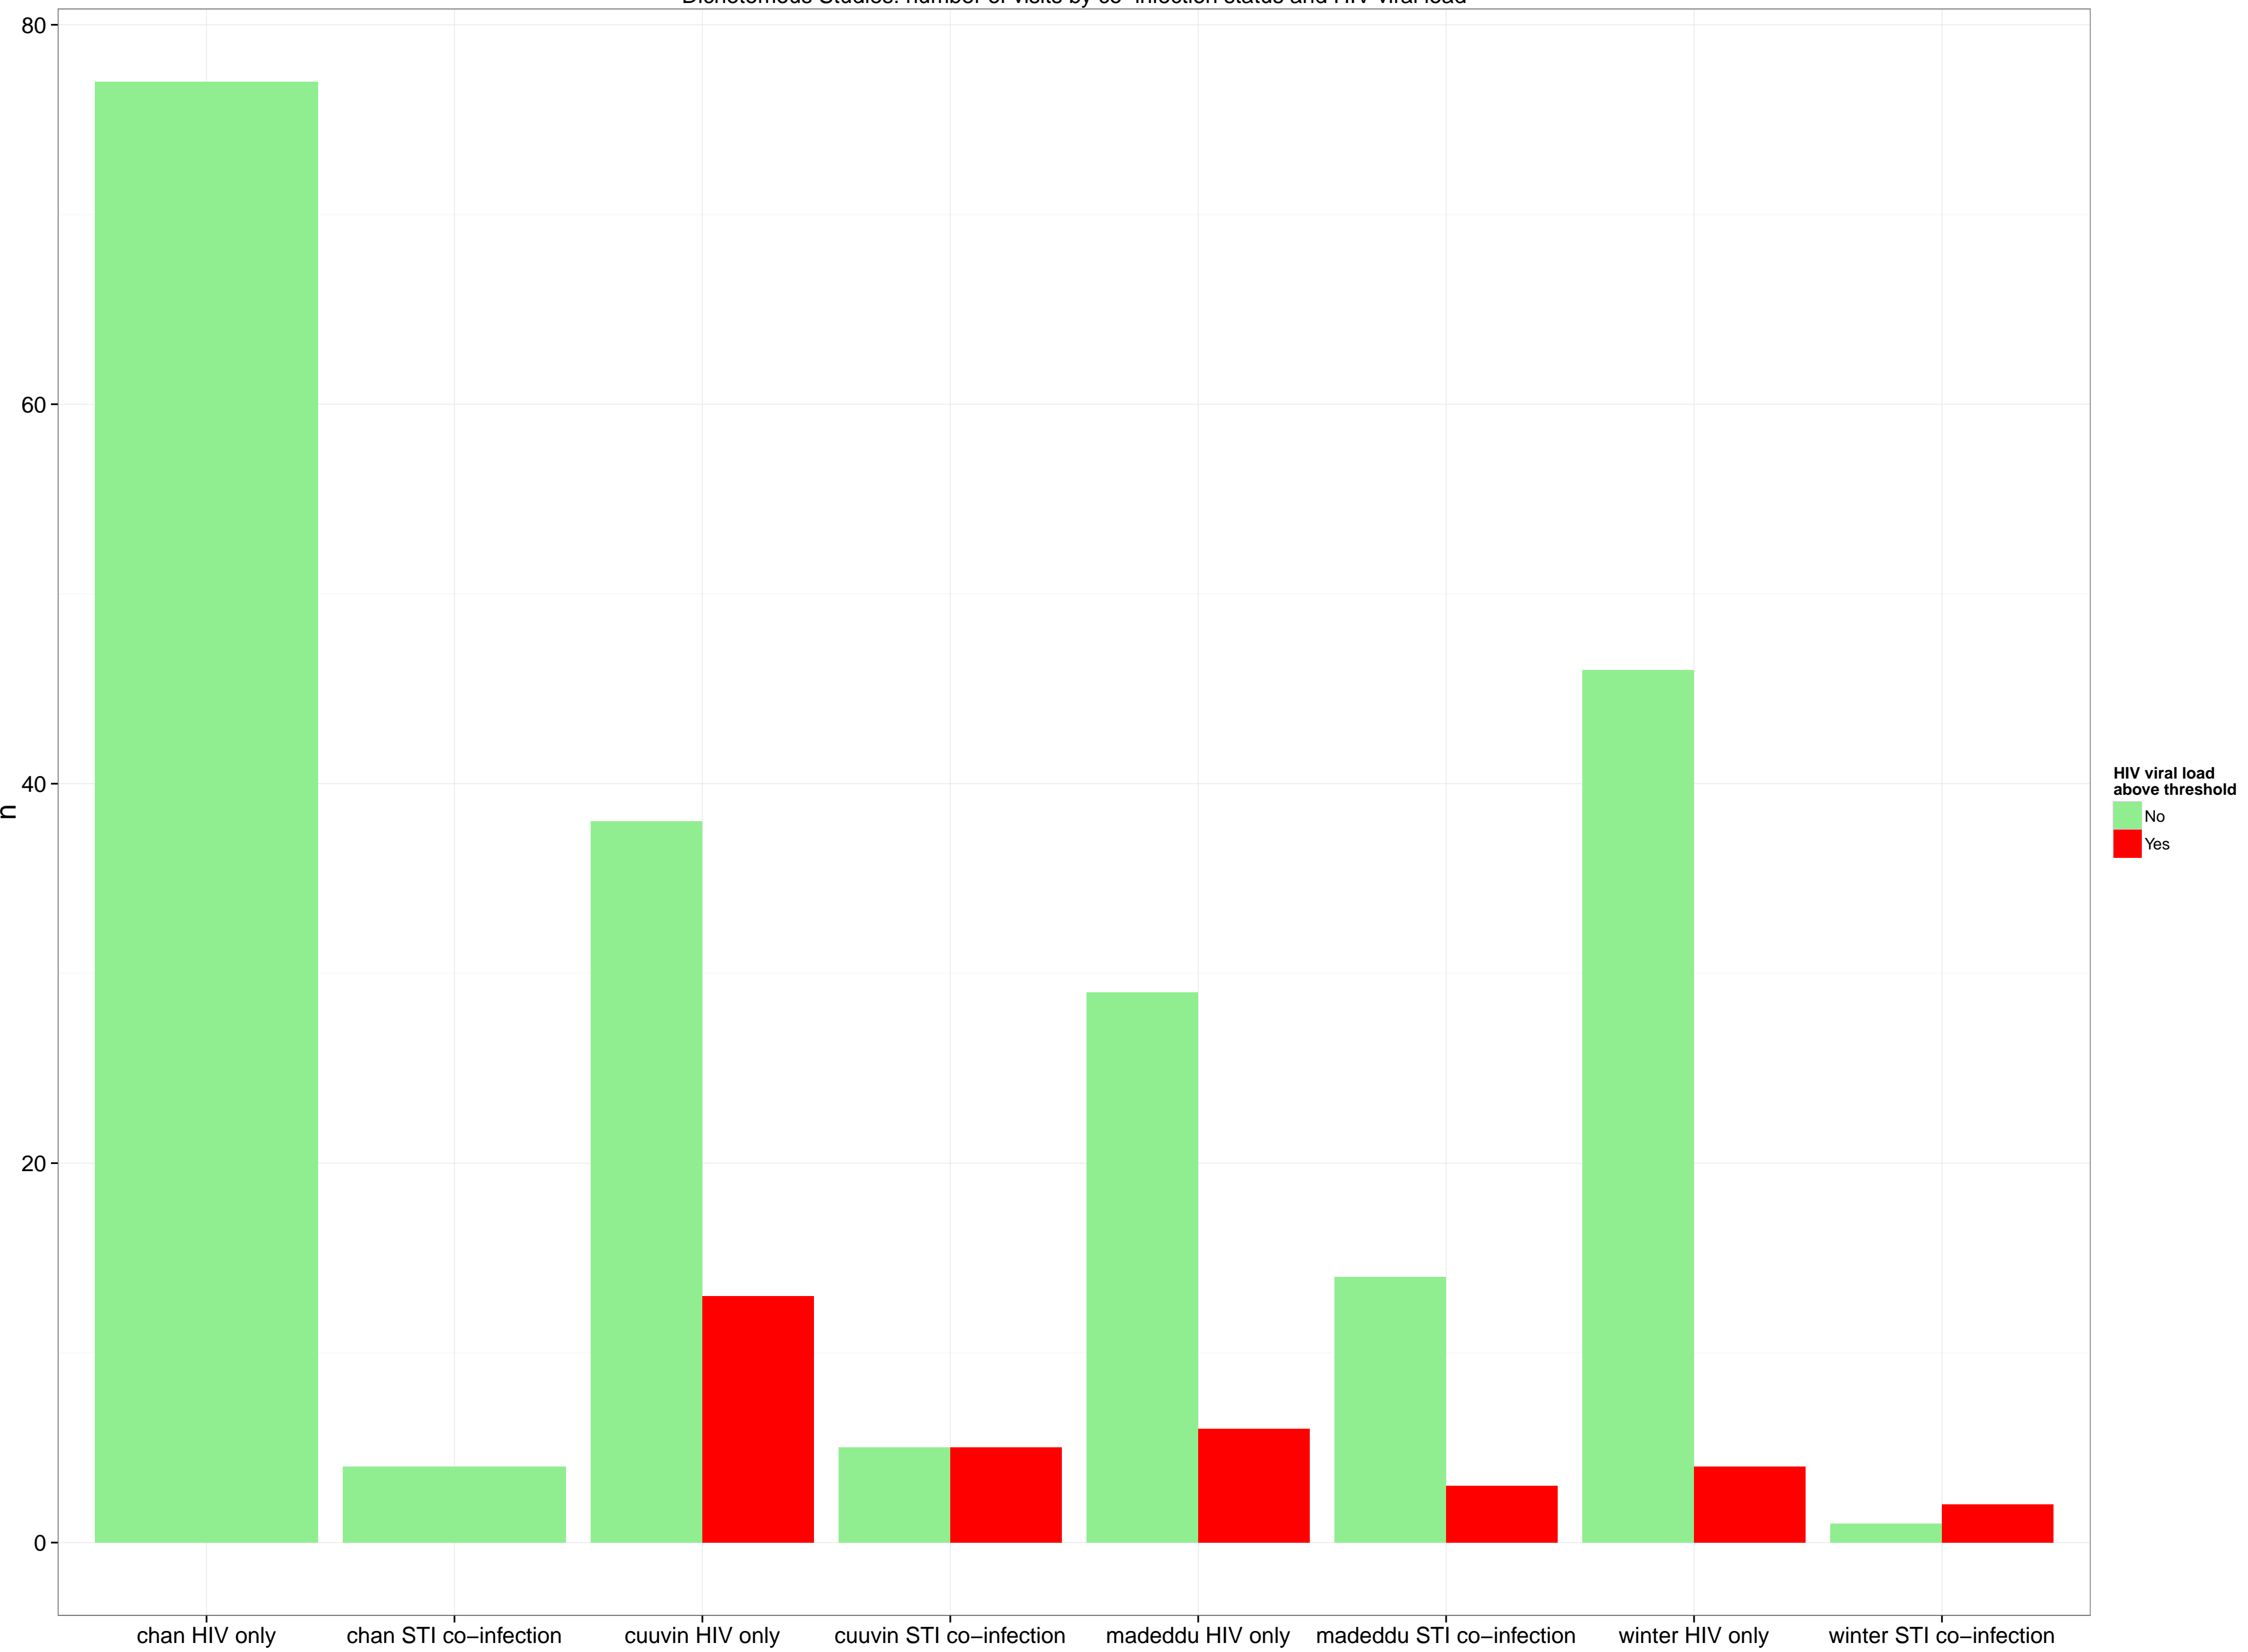

Number of STI cases at any visit  
(cases without STI co-infection excluded)

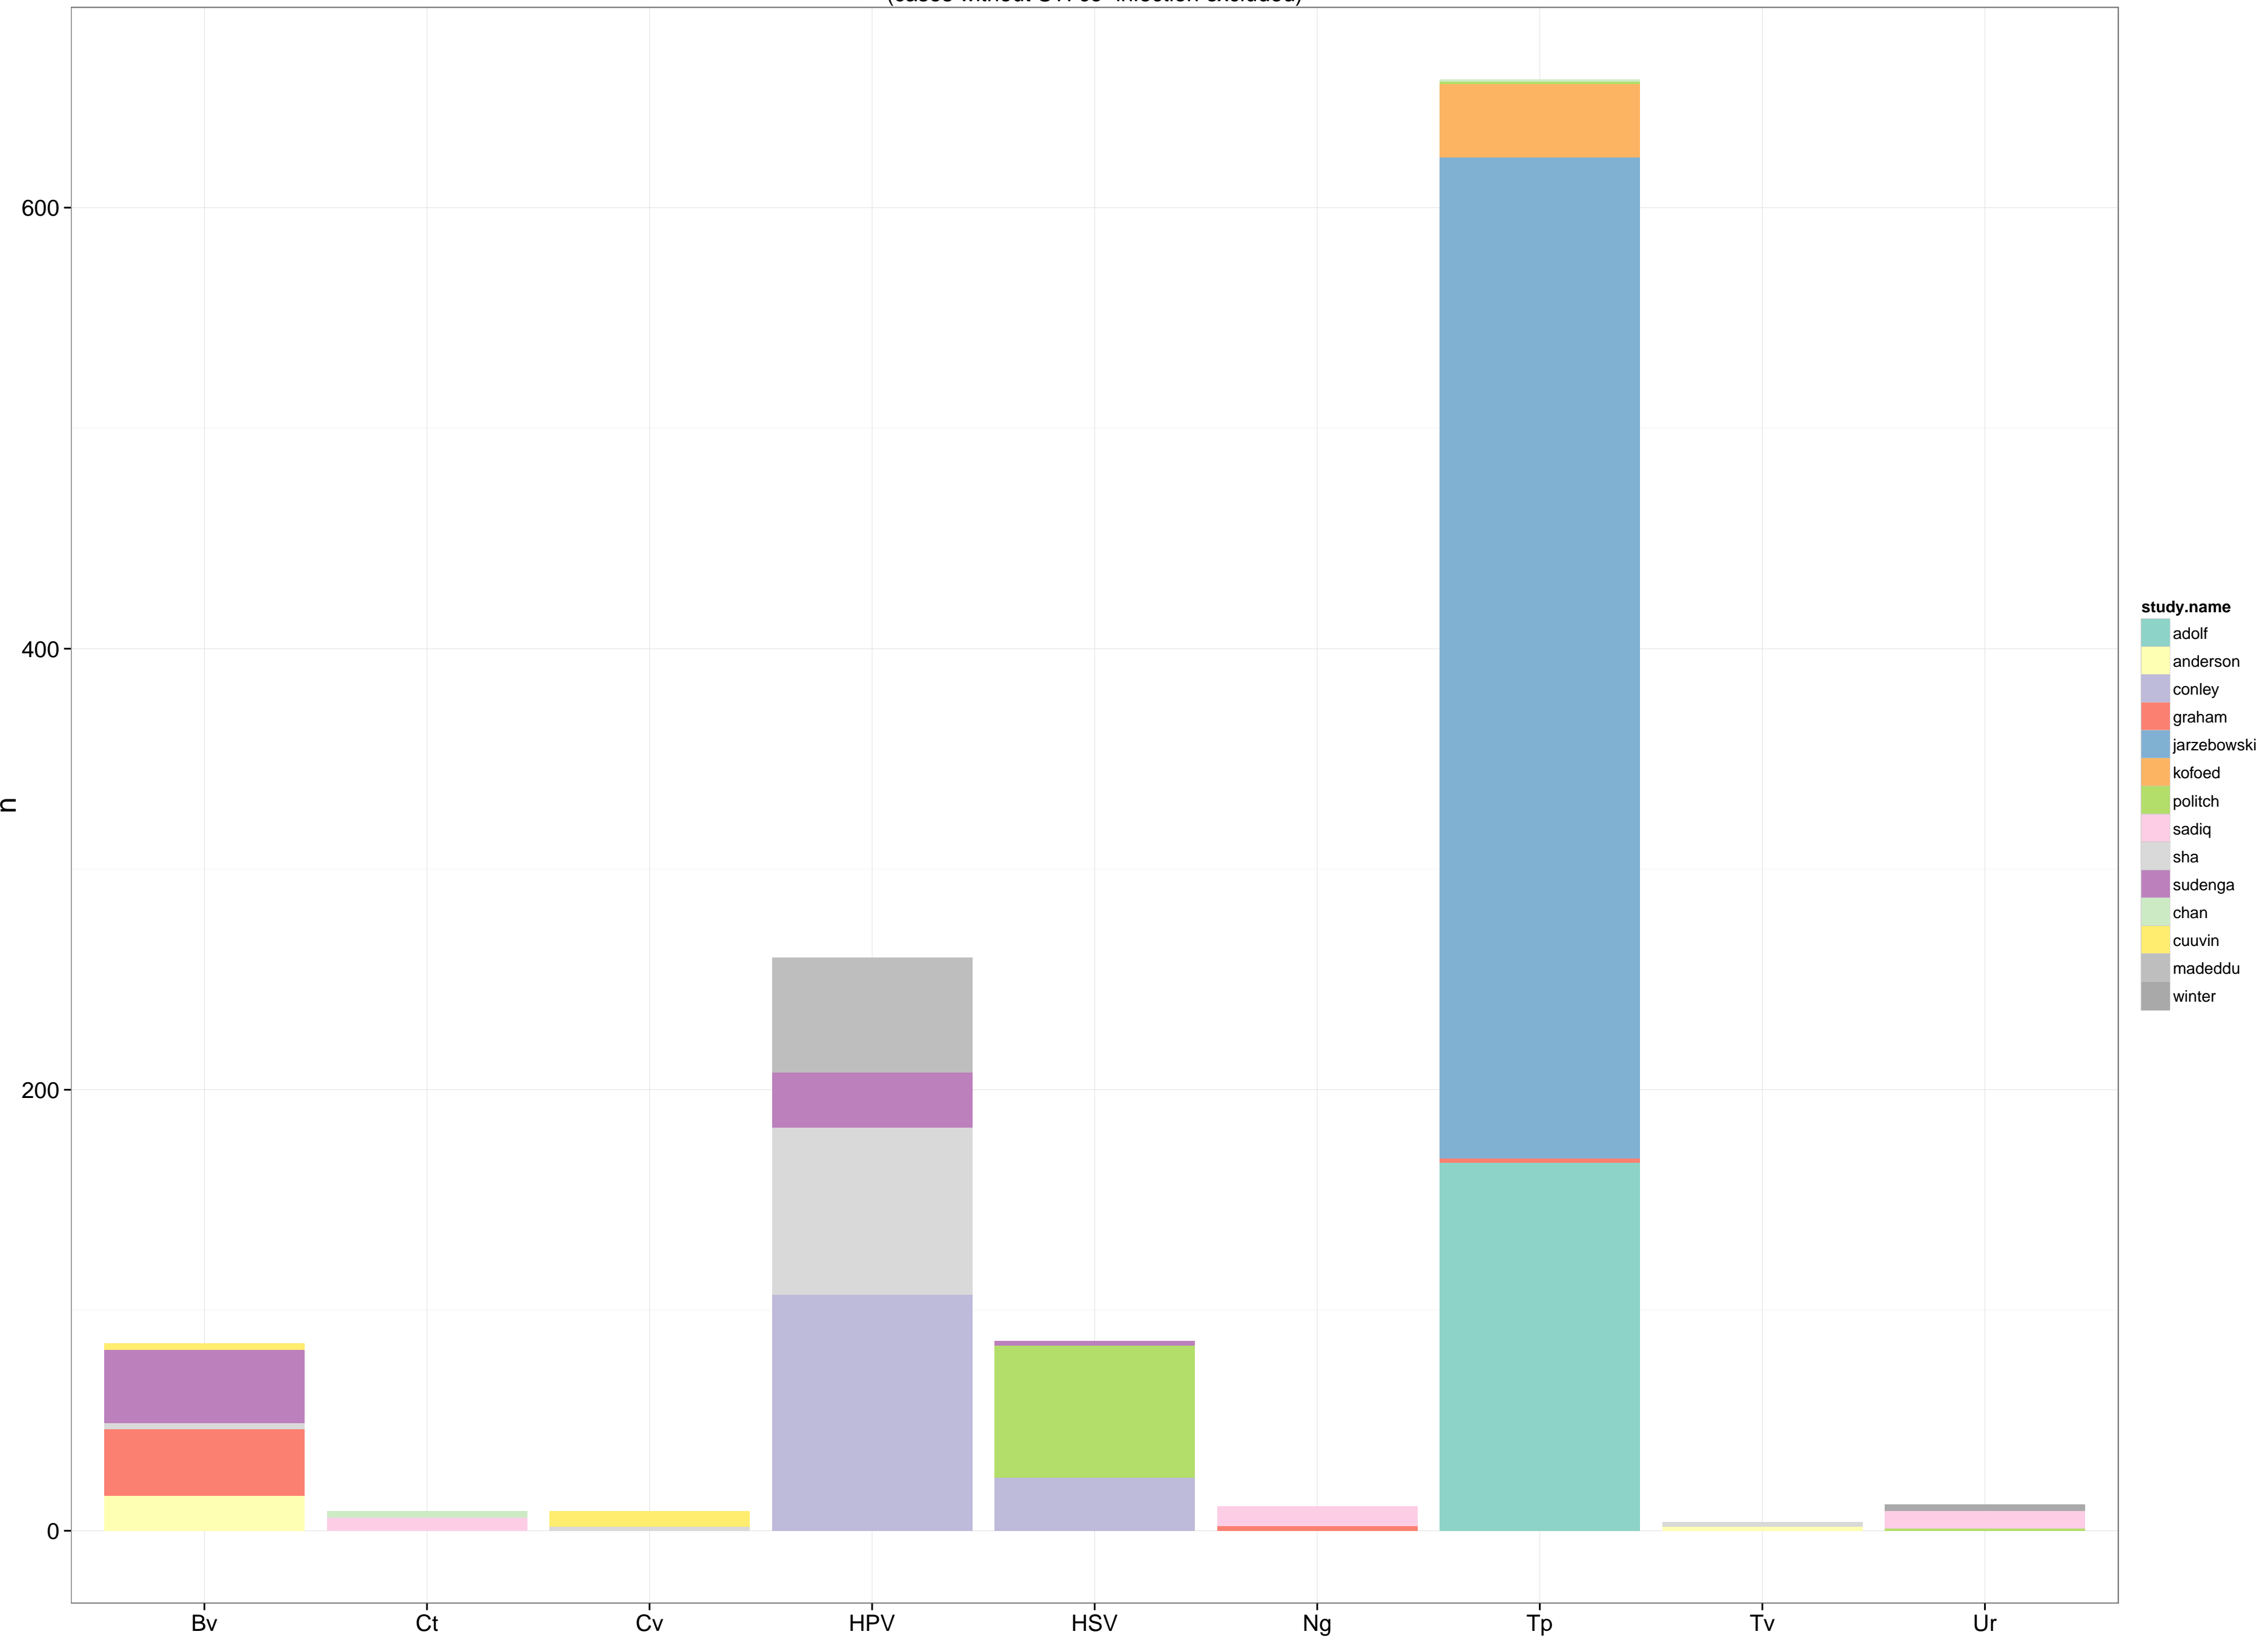

Number of HIV VL measurements for all anatomical sites

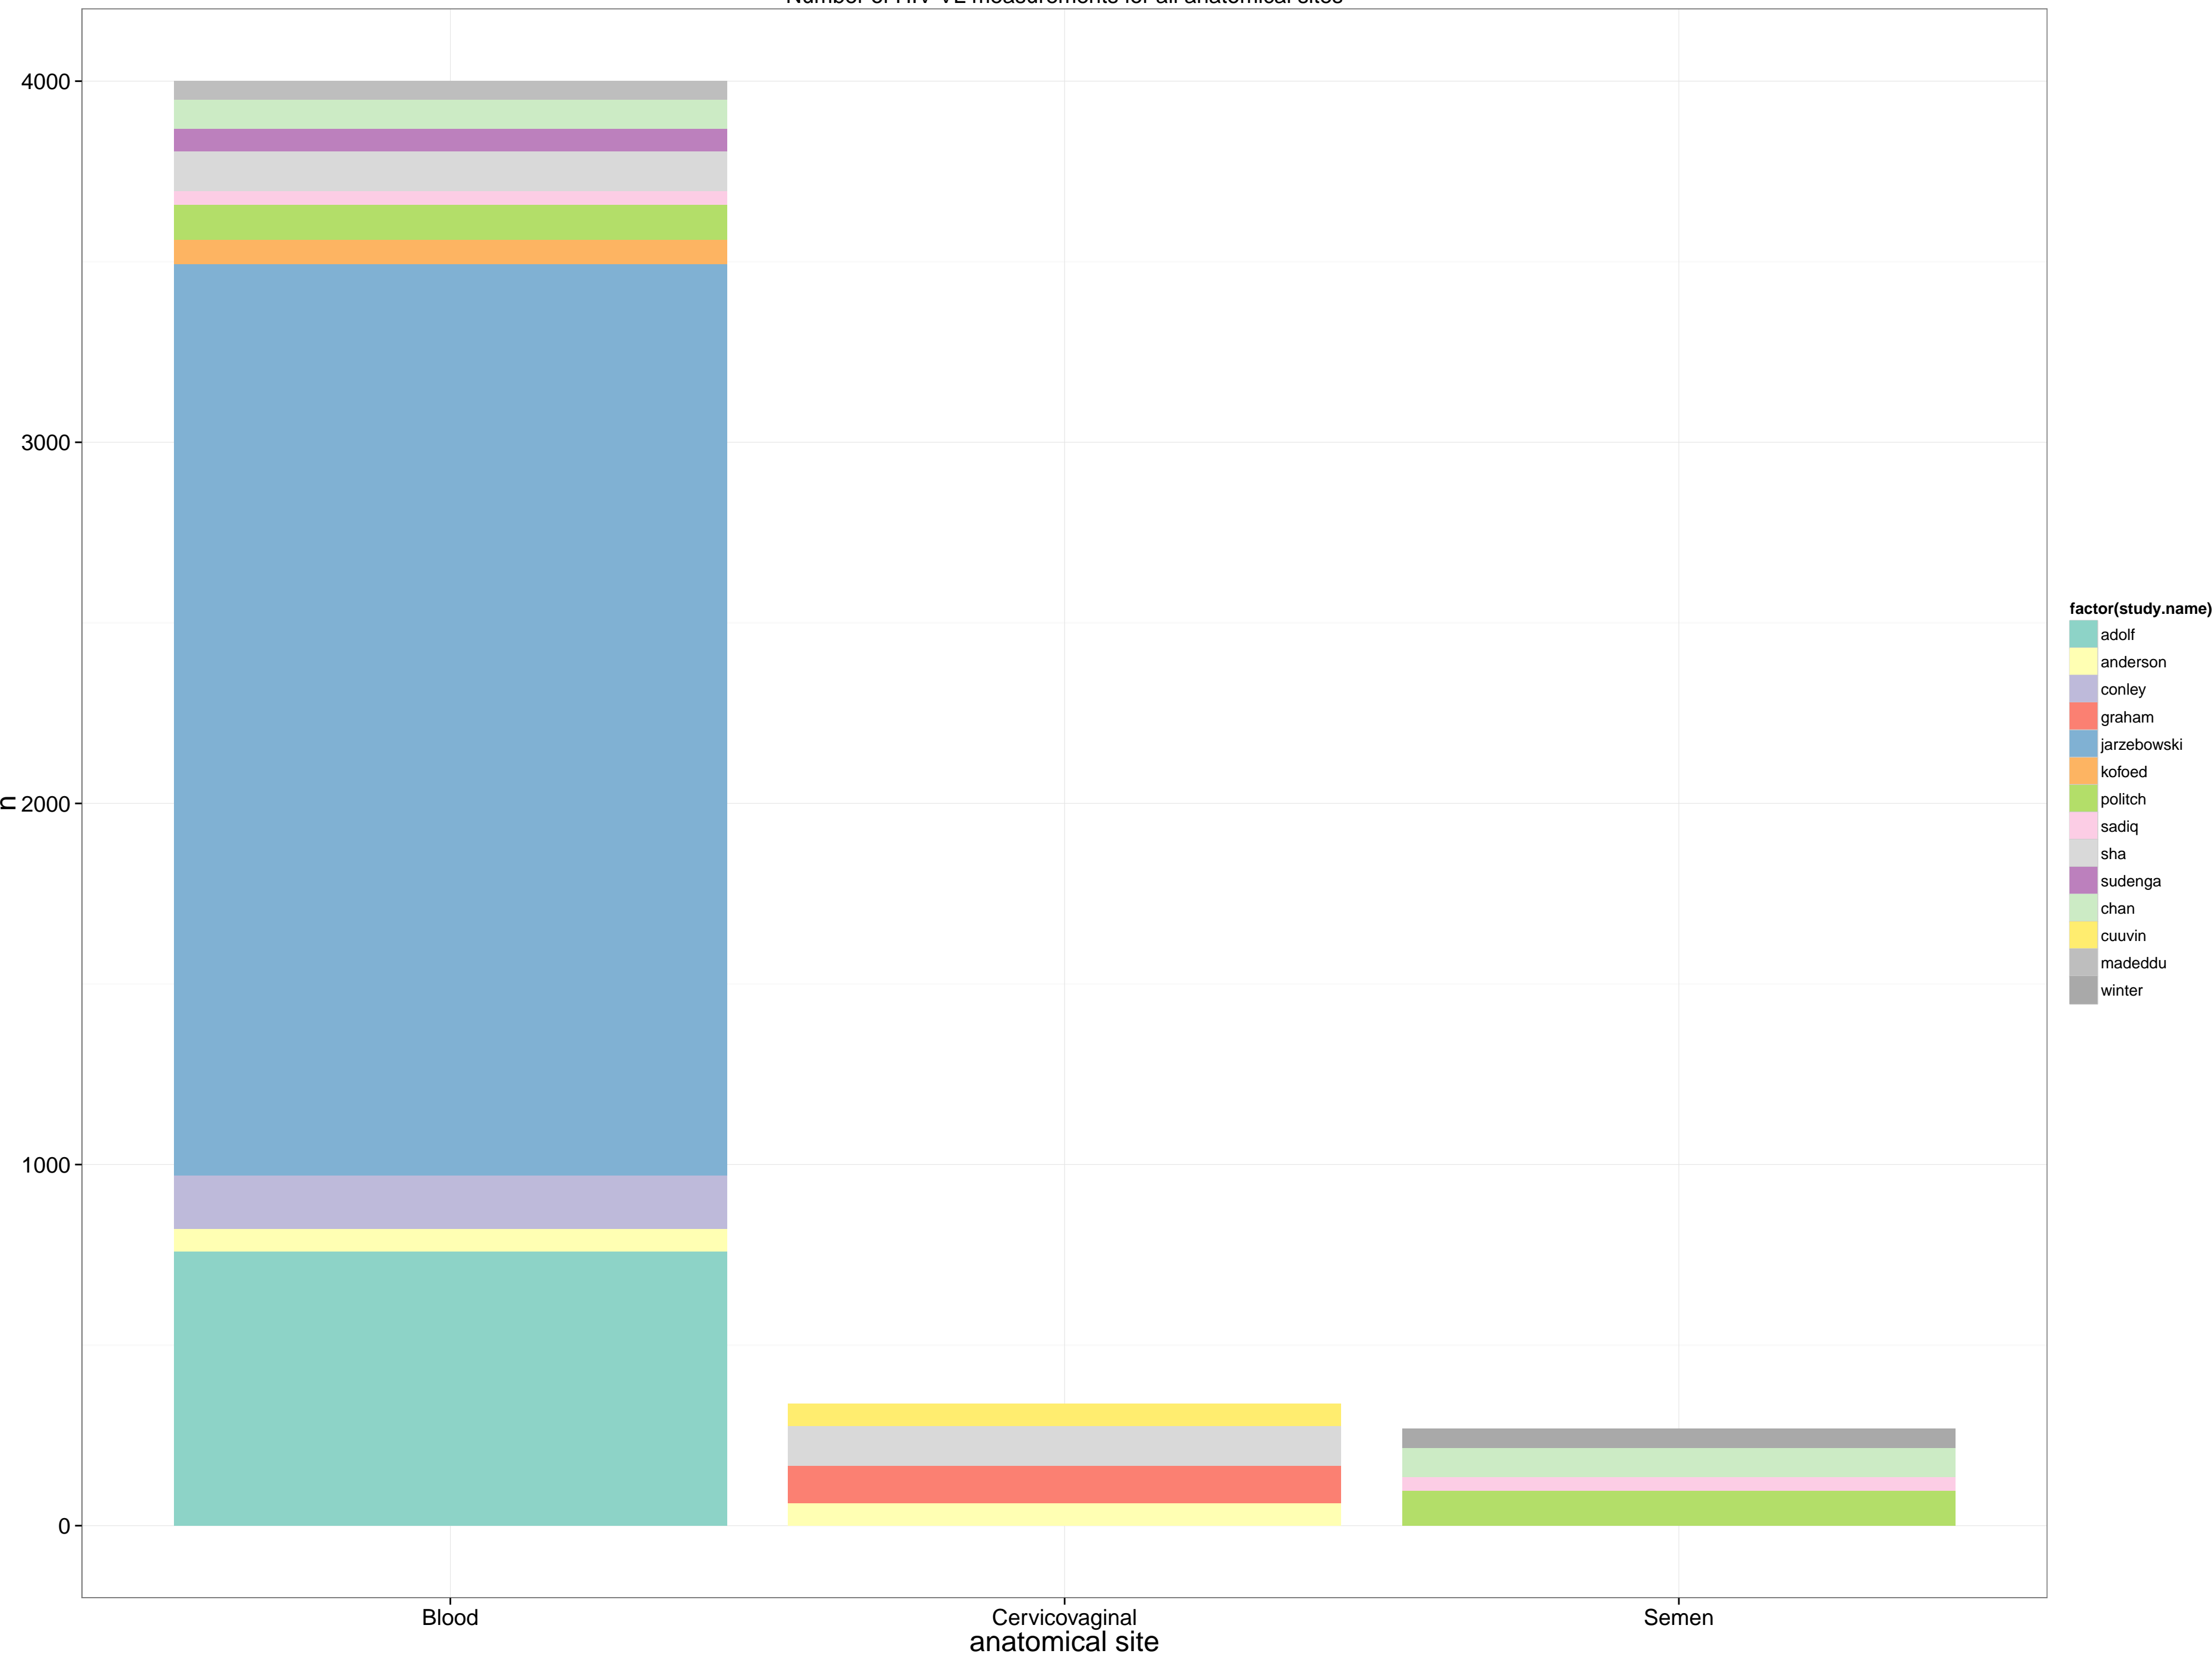

Gender and STI co-infection status

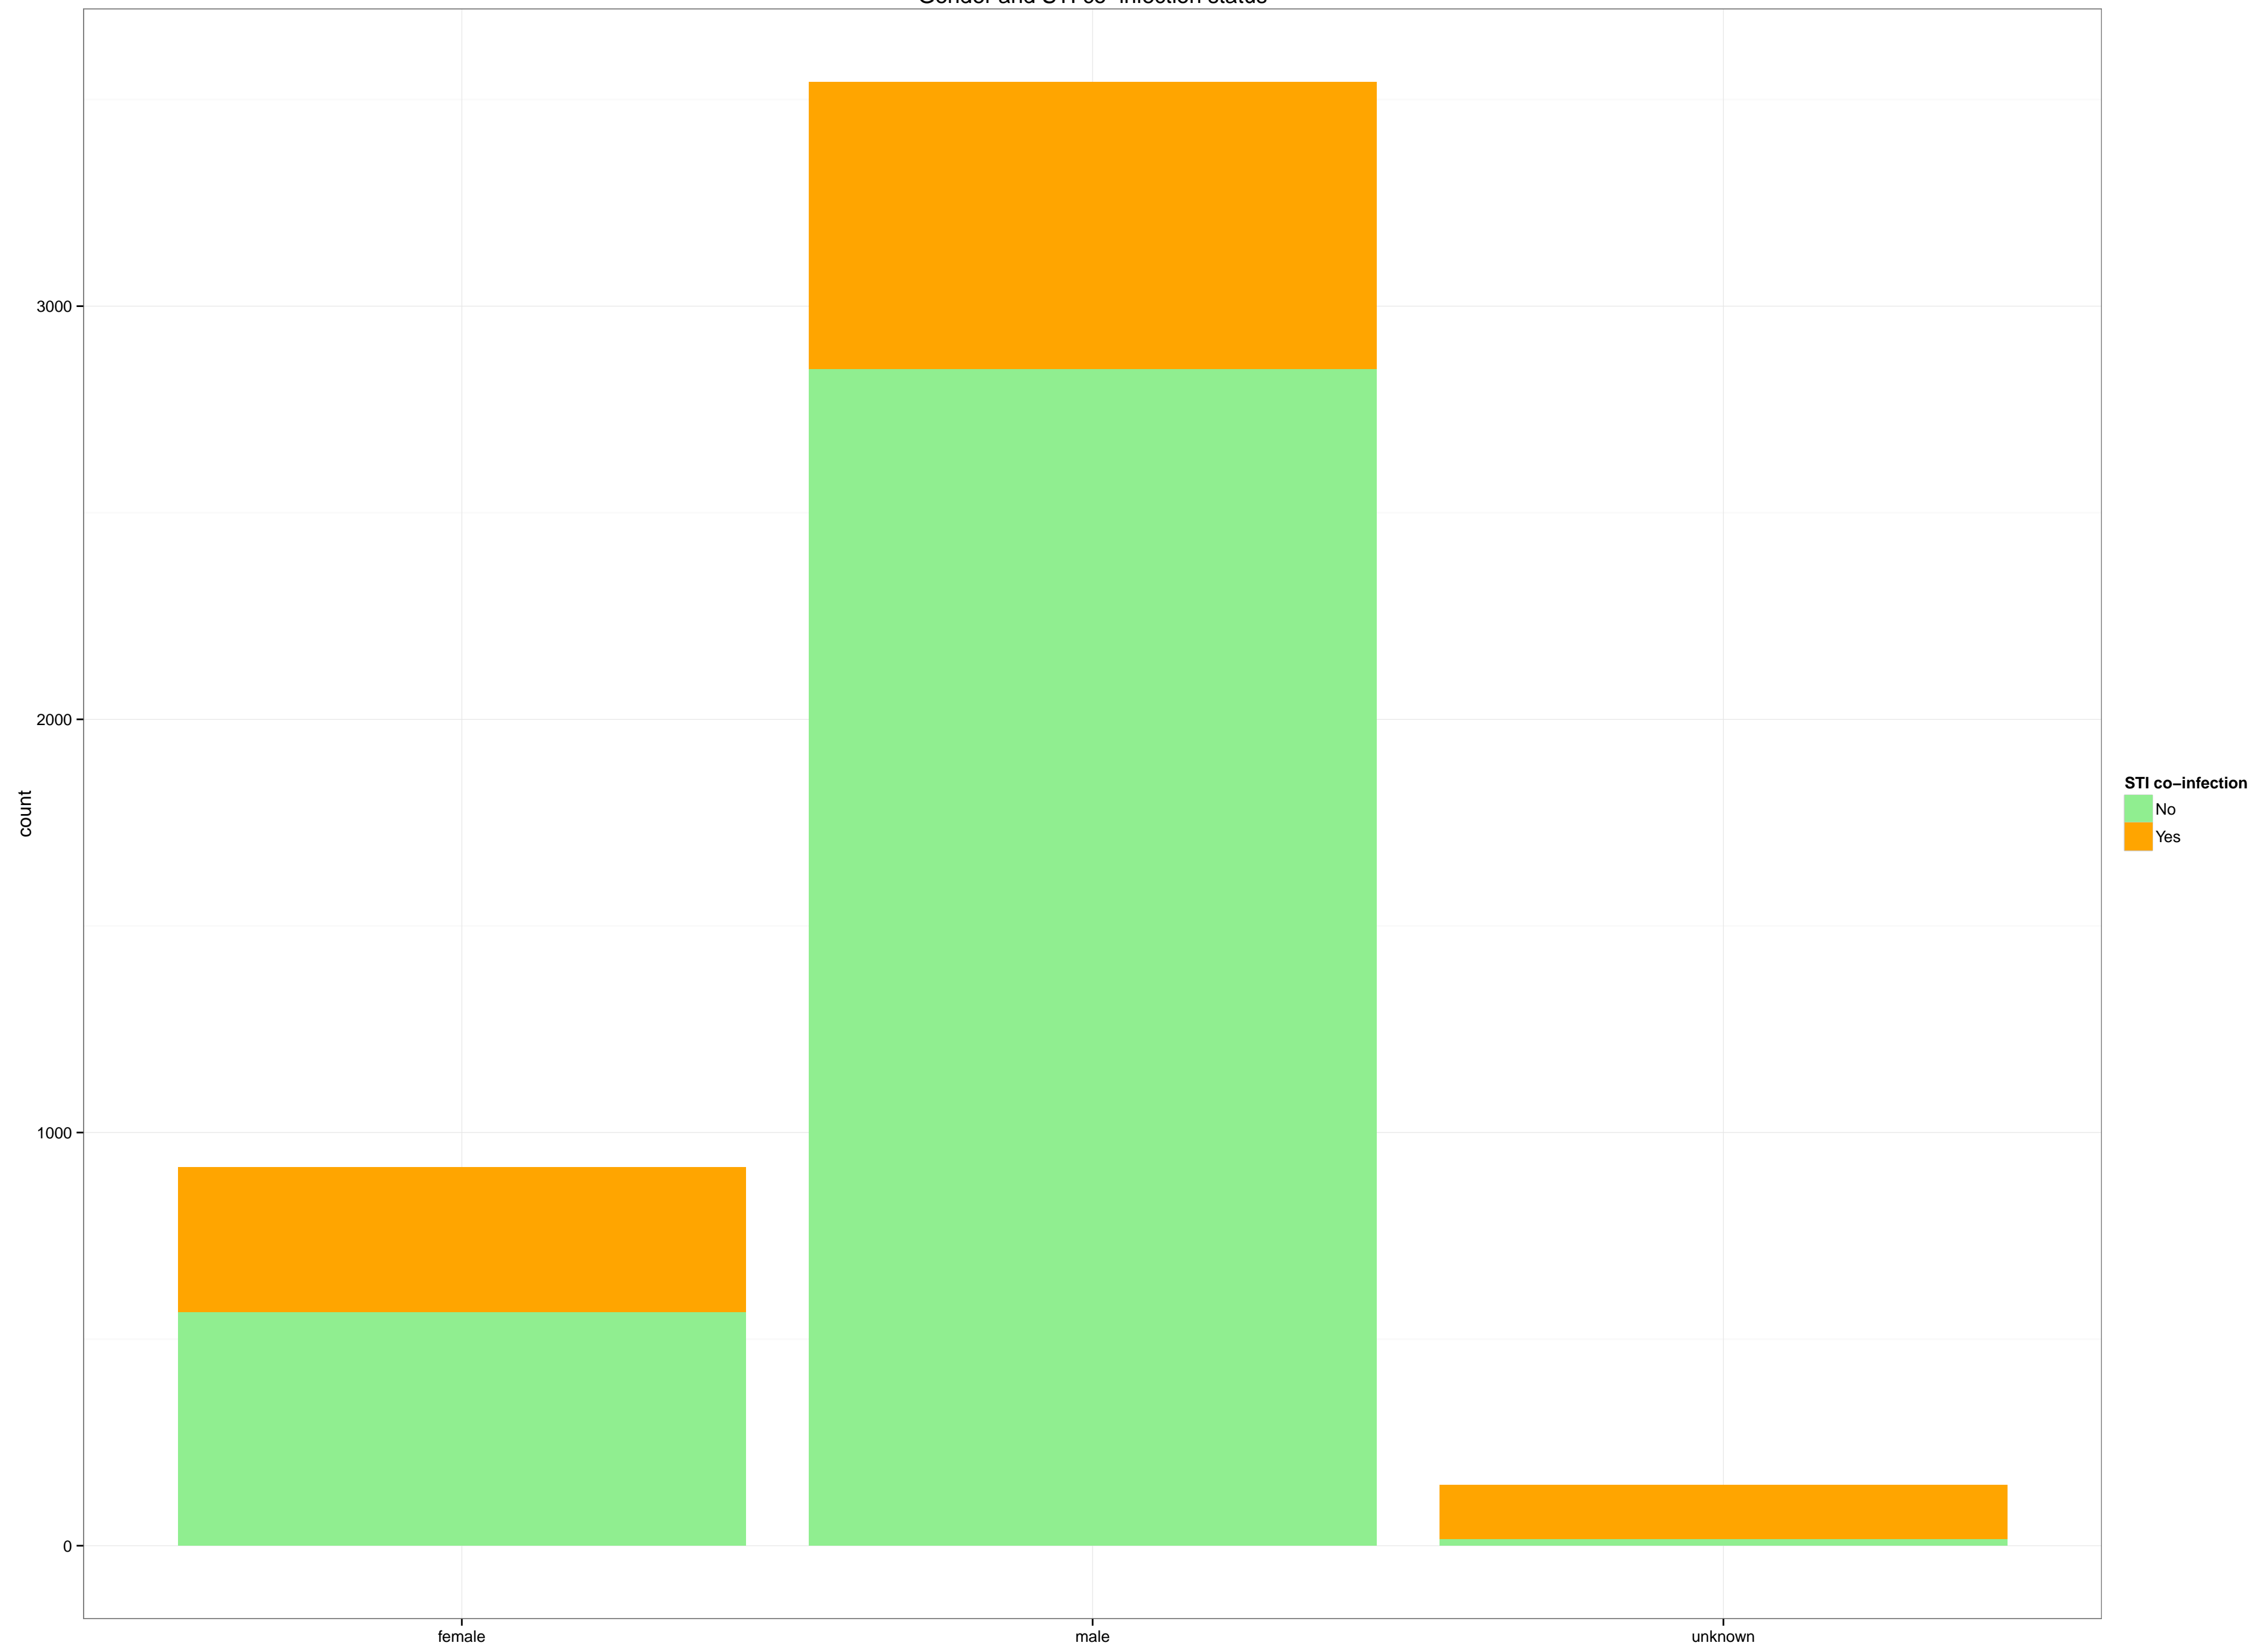

STI co-infections by gender

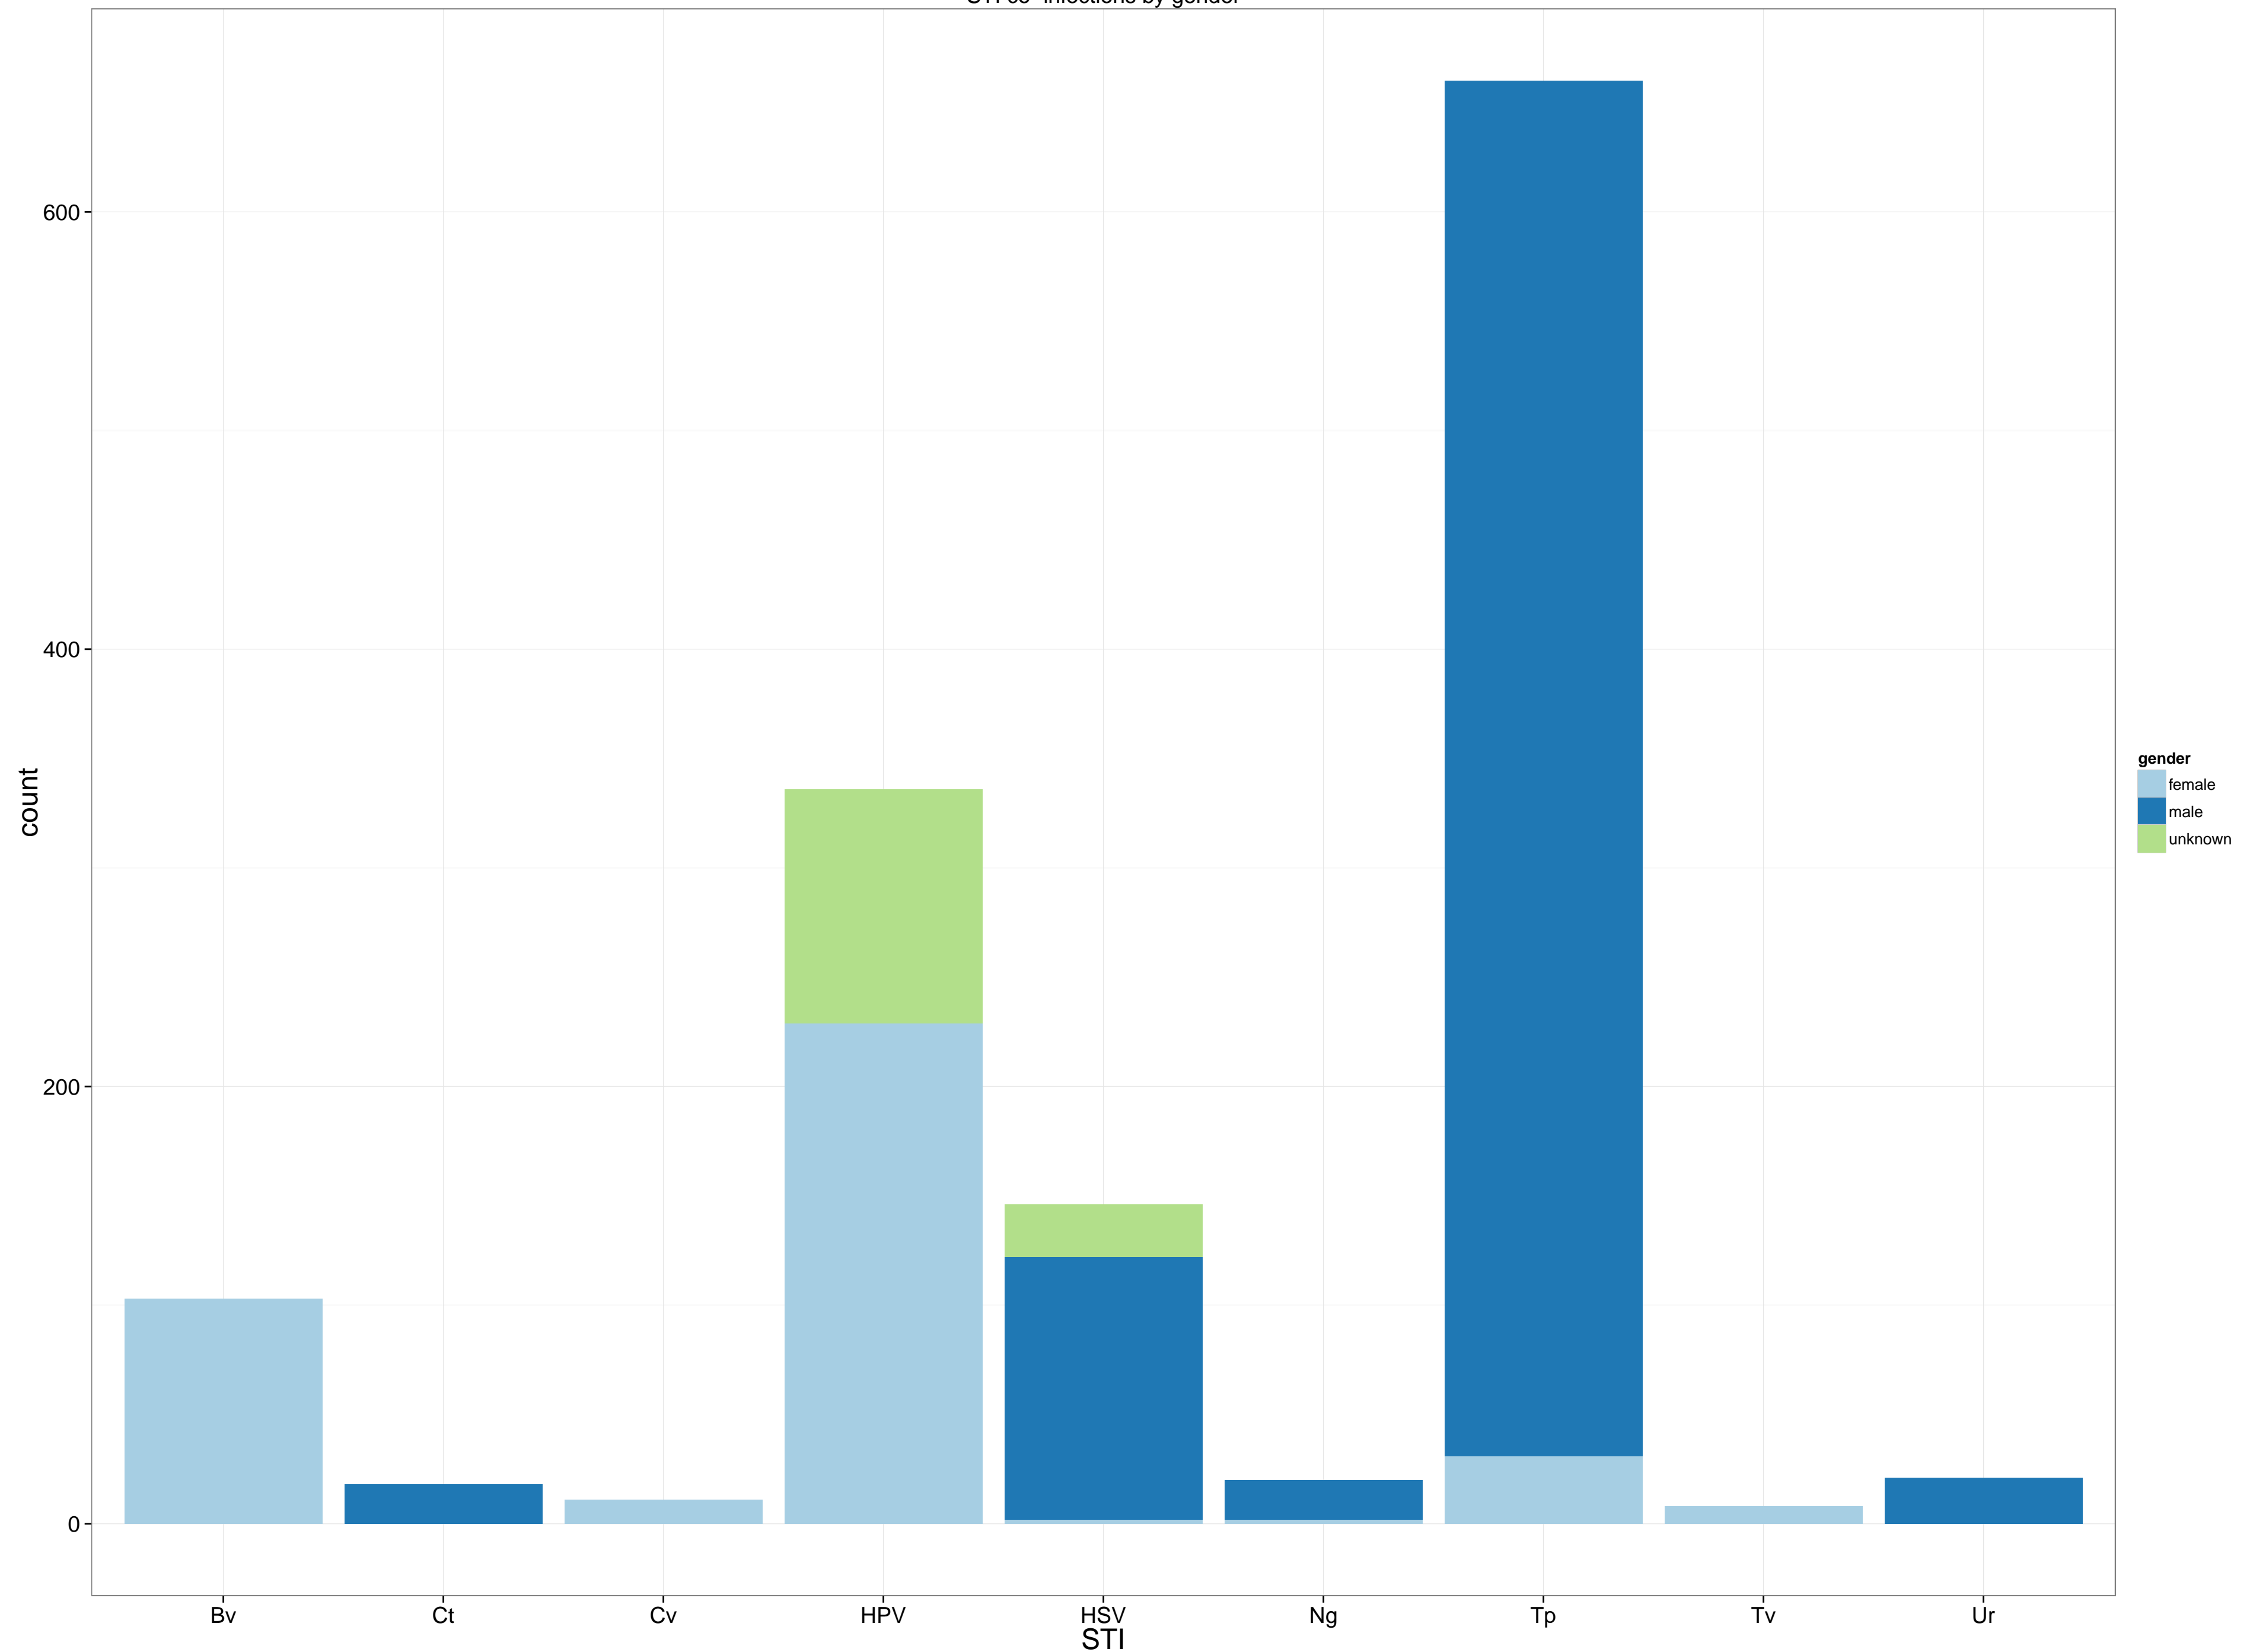

Continuous studies and log10 viral load by studies

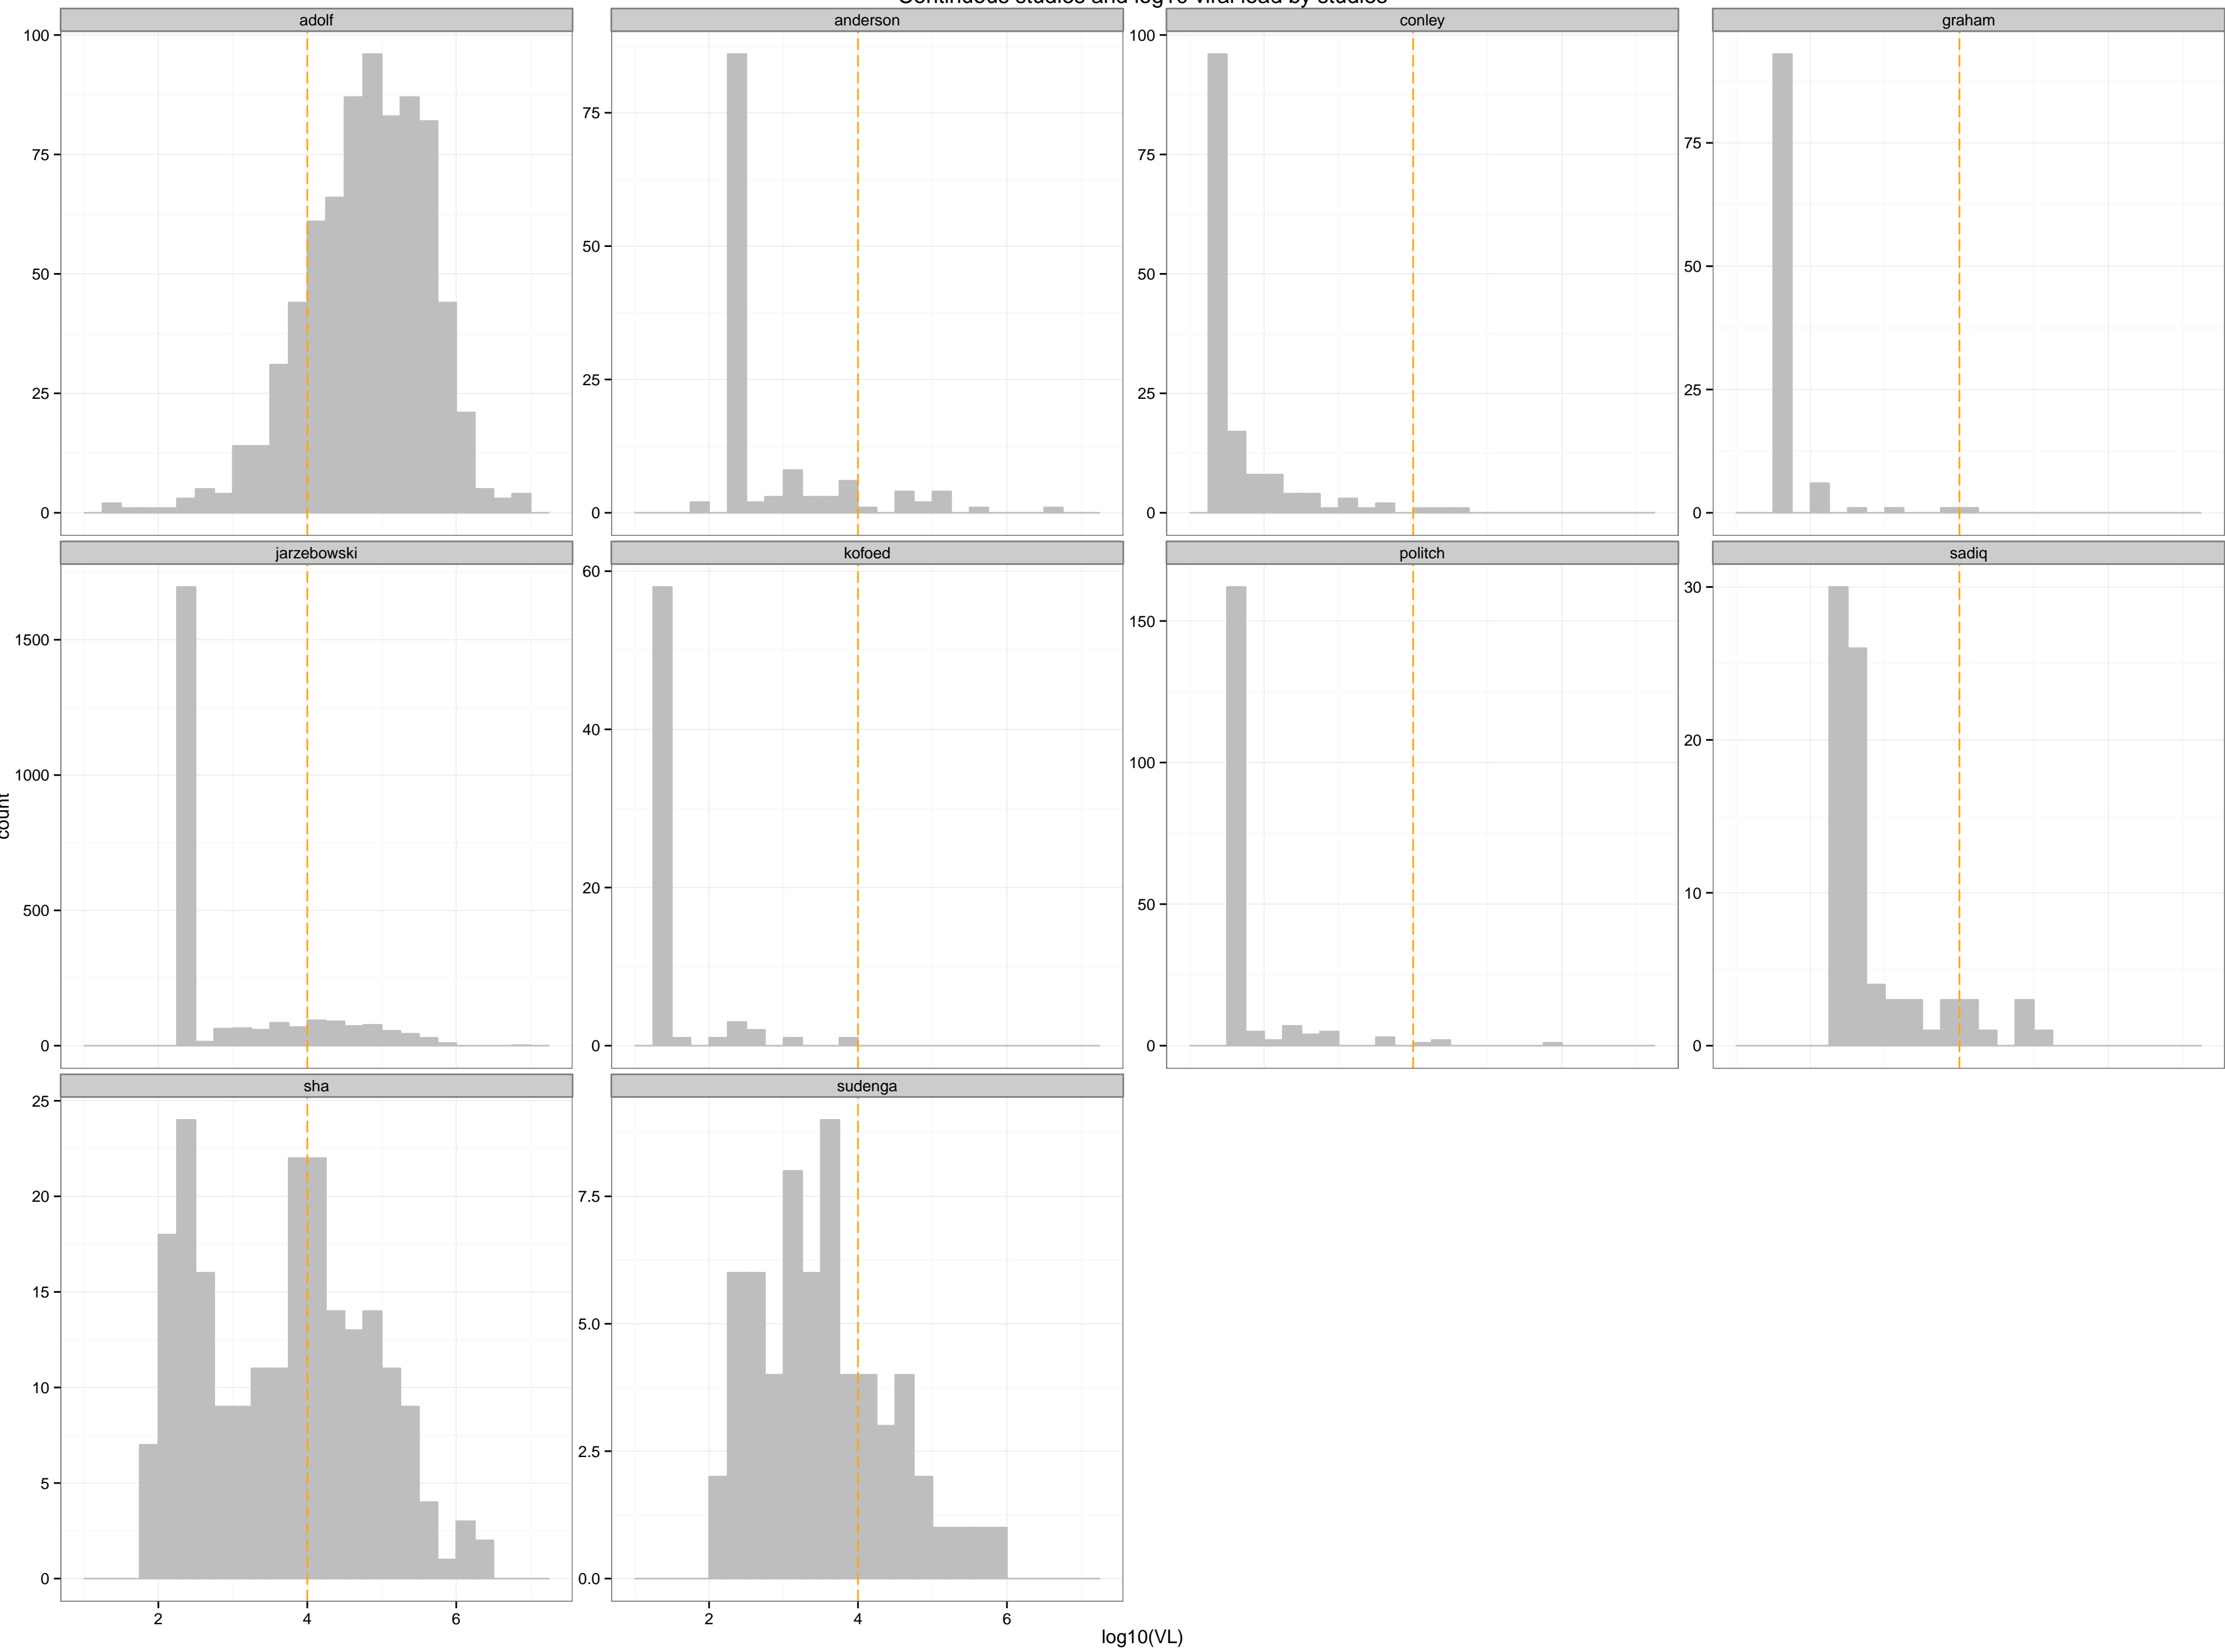



Continuous studies and log10 viral load by STI co-infection status

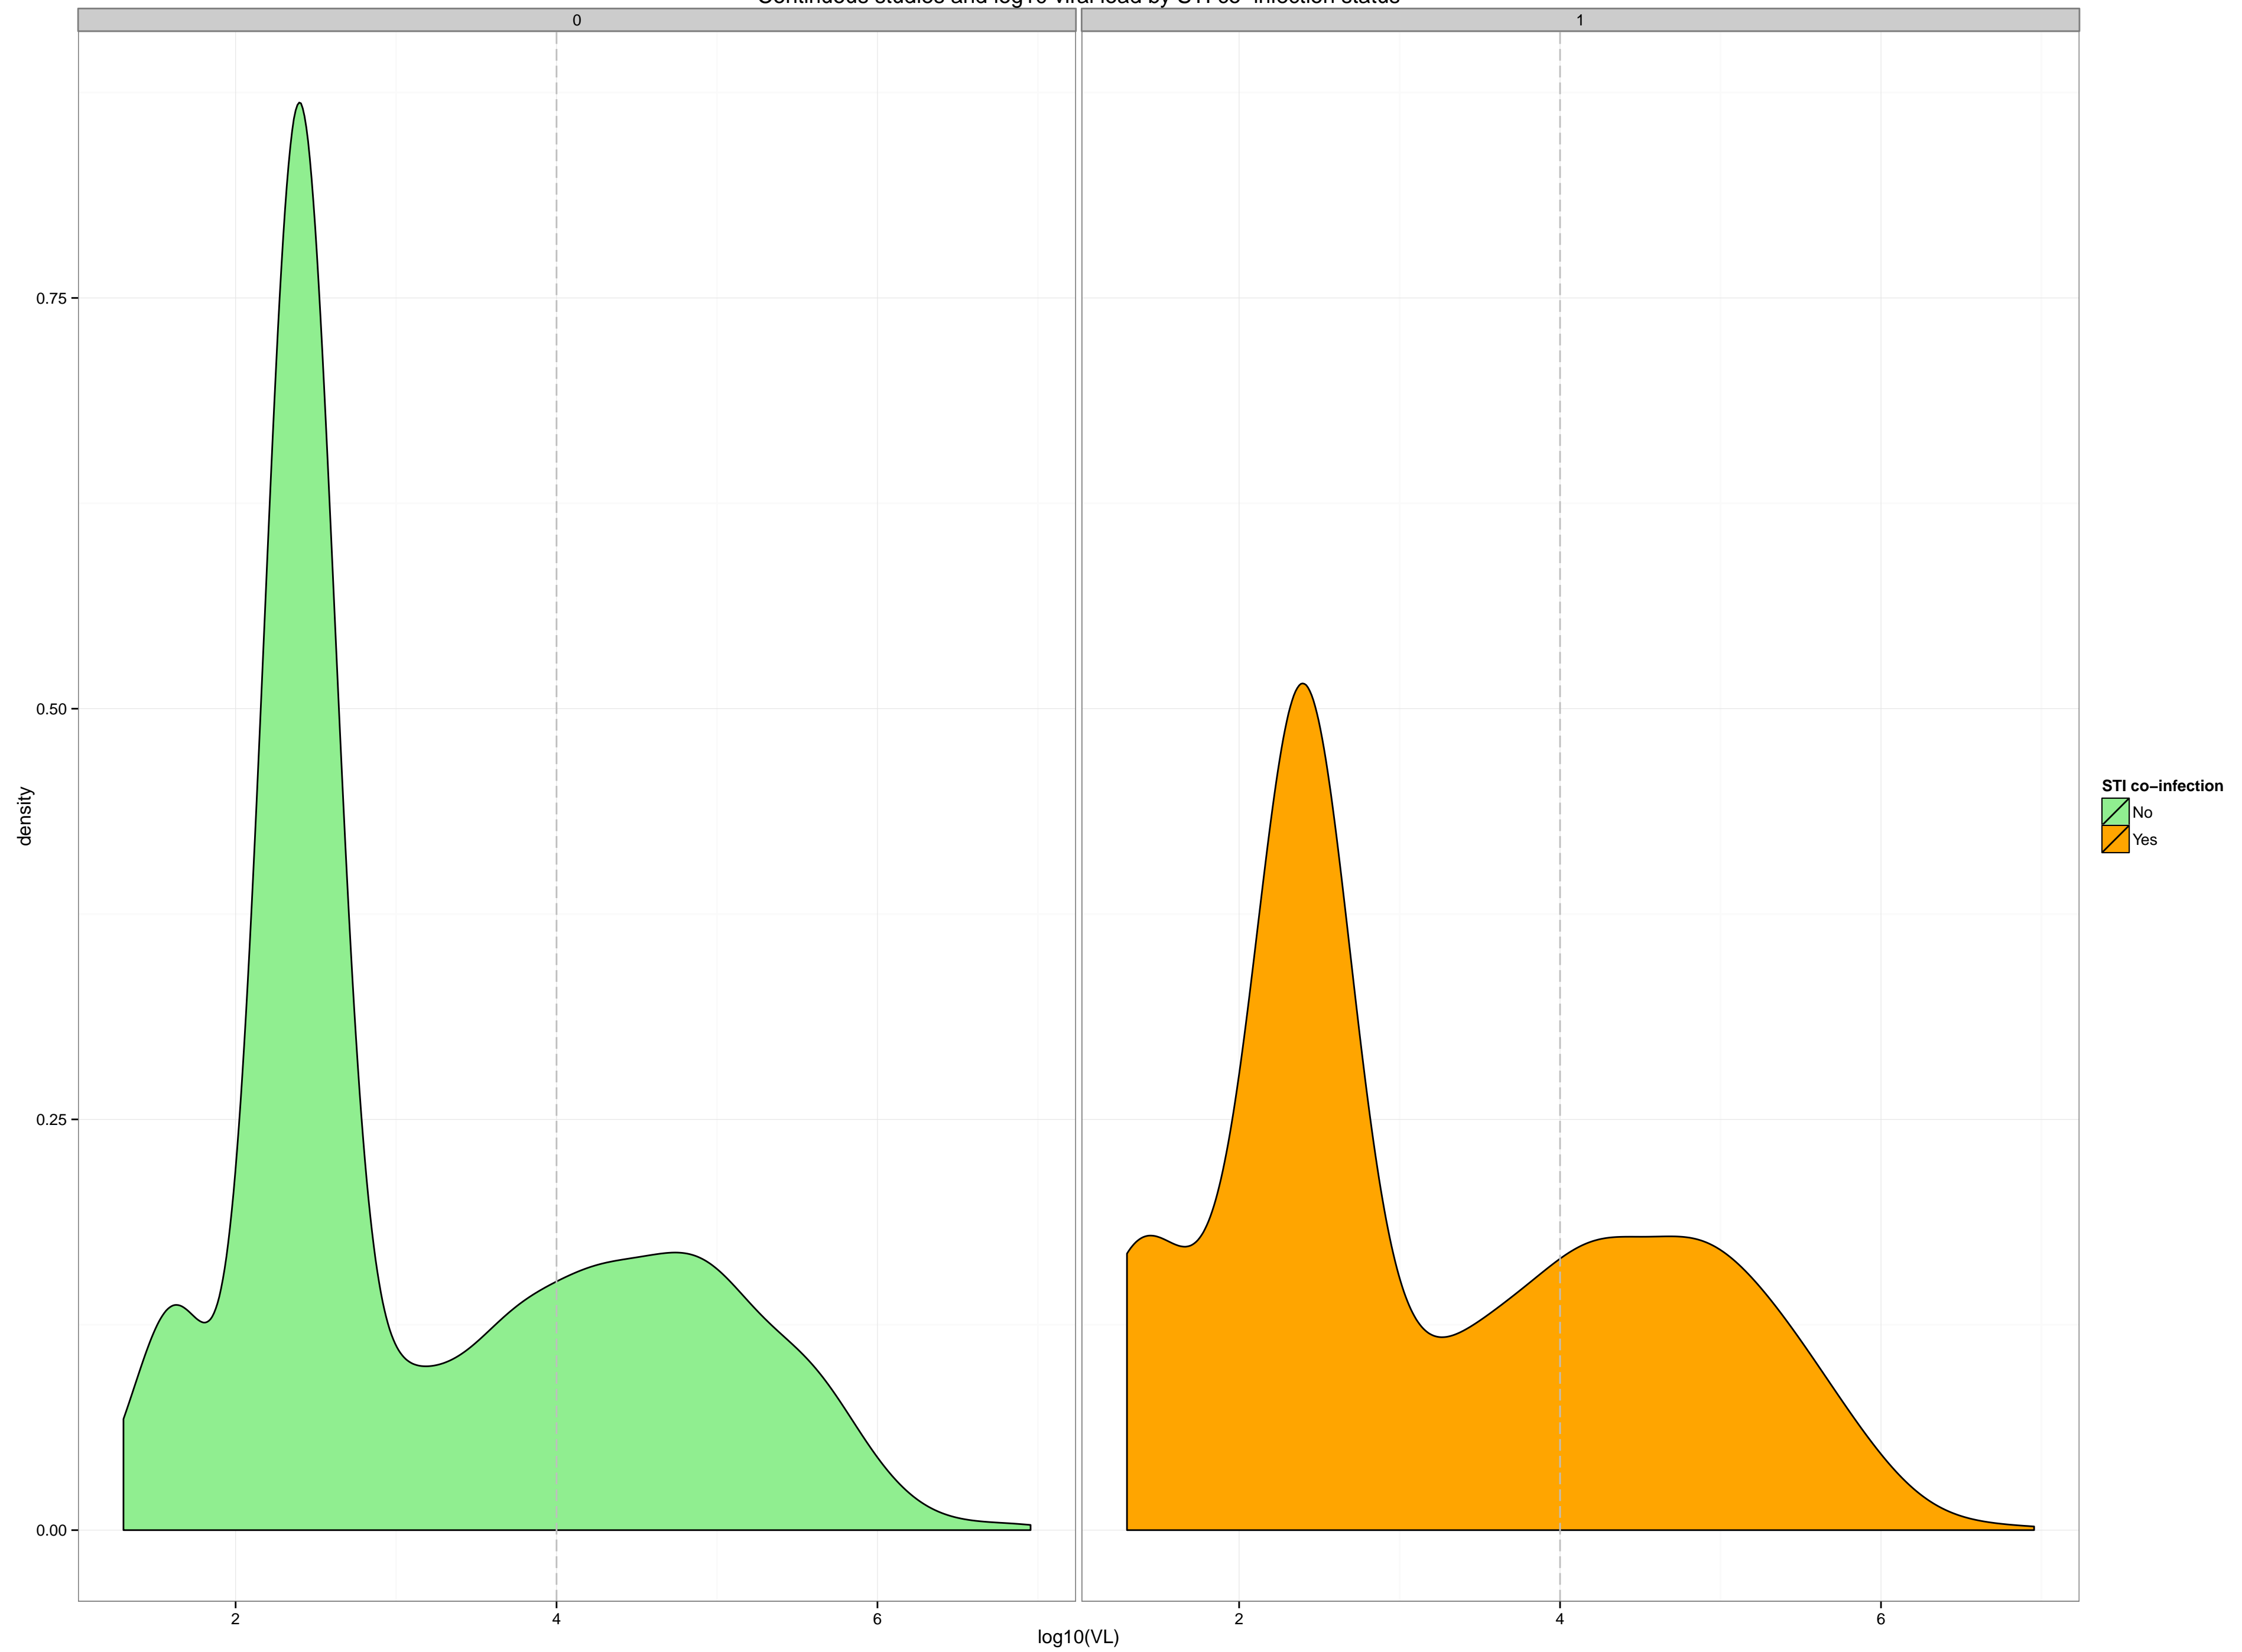

Supplement: MOESM6 [file 9739914]
